# Supplementary material for: Rediscovery of nylon upgraded by interactive biorenewable nano-fillers
Source: Royal Society of Chemistry journal article supplement (doi:10.1039/c9nr08091k), 2019-11-11
Supplement: c9nr08091k1.pdf [file c9nr08091k1.pdf]

## Supporting Information

# Rediscovery of nylon upgraded by interactive biorenewable nanofillers

Lam Tan Hao,<sup>‡a,b</sup> Youngho Eom,<sup>‡a,c</sup> Thang Hong Tran,<sup>a,b</sup> Jun Mo Koo,<sup>a</sup> Jonggeon Jegal,<sup>a</sup> Sung  
Yeon Hwang,<sup>\*a,b</sup> Dongyeop X. Oh<sup>\*a,b</sup> and Jeyoung Park<sup>\*a,b</sup>

<sup>a</sup> *Research Center for Bio-based Chemistry, Korea Research Institute of Chemical Technology (KRICT), Ulsan 44429, Republic of Korea. E-mail: crew75@kRICT.re.kr, dongyeop@kRICT.re.kr, jypark@kRICT.re.kr*

<sup>b</sup> *Advanced Materials and Chemical Engineering, University of Science and Technology (UST), Daejeon 34113, Republic of Korea*

<sup>c</sup> *Department of Polymer Engineering, Pukyong National University, Busan, 48513, Republic of Korea*

<sup>‡</sup> These authors contributed equally.

\* Corresponding authors

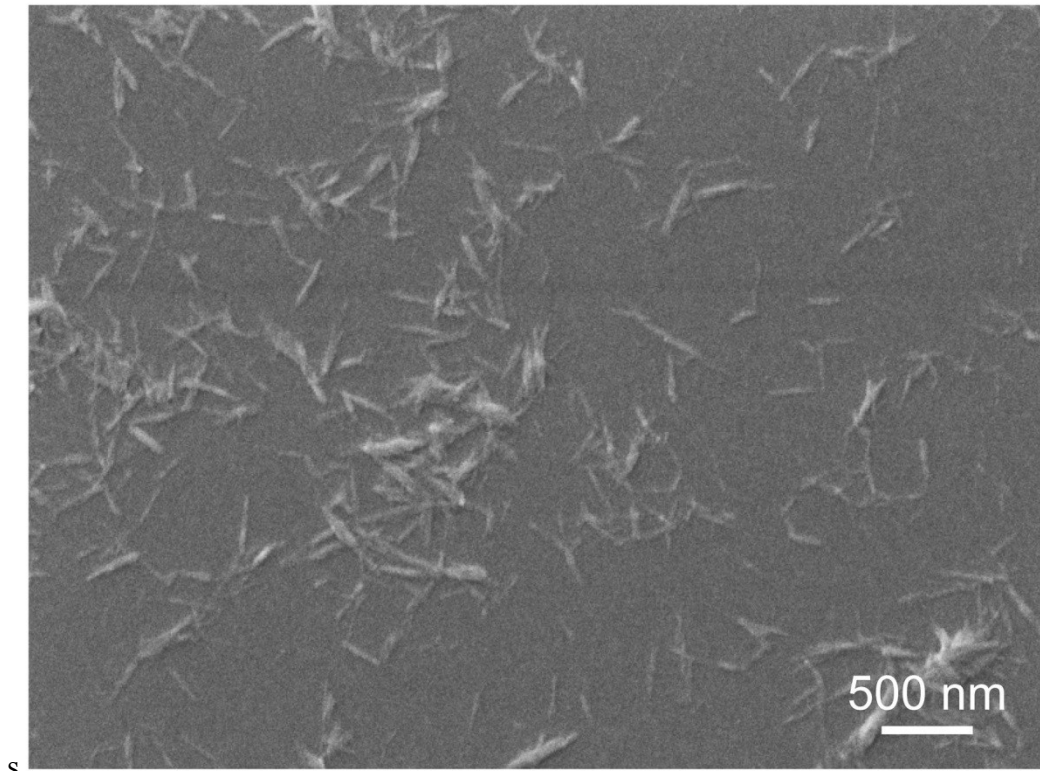

**Fig. S1** Scanning electron microscope (SEM) image of chitosan nanowhisker (CSW).

The average size range of CSW was determined by measuring the diameter and length of 100 random whiskers using SEM. The diameter was measured to be in the 10–25 nm range, and the length was measured to be in the 150–250 nm range. Furthermore, the length of CSW based on the hydrodynamic diameter of an equivalent sphere was measured to be 228.1 nm (with a zeta potential of +43.3 mV at pH 4) using the zeta sizer (Nano ZS, Malvern, UK).

**Table S1** Preparation, molecular weight, and thermal properties of nylon 66 nanocomposites.

| Nanofiller content (wt%)                            | Sample code | $M_v^a$ (g mol <sup>-1</sup> ) | $T_{d5}^b$ (°C) | $T_{max}^c$ (°C) | $T_c^d$ (°C) |
|-----------------------------------------------------|-------------|--------------------------------|-----------------|------------------|--------------|
| 0.0 (neat)                                          | Ny66        | 33,500                         | 359             | 408              | 229          |
| <i>In situ</i> nylon 66/CNC <sup>e</sup> composites |             |                                |                 |                  |              |
| 0.1                                                 | I-NC0.1     | 30,800                         | 365             | 412              | 232          |
| 0.2                                                 | I-NC0.2     | 30,100                         | 363             | 411              | 233          |
| 0.3                                                 | I-NC0.3     | 33,900                         | 363             | 416              | 234          |
| 0.4                                                 | I-NC0.4     | 30,900                         | 380             | 421              | 236          |
| 0.5                                                 | I-NC0.5     | 27,800                         | 371             | 415              | 238          |
| <i>In situ</i> nylon 66/CSW <sup>f</sup> composites |             |                                |                 |                  |              |
| 0.1                                                 | I-NS0.1     | 29,400                         | 367             | 424              | 233          |
| 0.2                                                 | I-NS0.2     | 30,900                         | 372             | 426              | 235          |
| 0.3                                                 | I-NS0.3     | 31,100                         | 378             | 433              | 234          |
| 0.4                                                 | I-NS0.4     | 29,000                         | 371             | 423              | 235          |
| 0.5                                                 | I-NS0.5     | 32,000                         | -               | -                | -            |
| Solution-blended nylon 66/CNC composites            |             |                                |                 |                  |              |
| 0.1                                                 | B-NC0.1     | 33,500                         | 371             | 412              | 231          |
| 0.2                                                 | B-NC0.2     |                                | 364             | 412              | 232          |
| 0.3                                                 | B-NC0.3     |                                | 364             | 414              | 234          |
| 0.4                                                 | B-NC0.4     |                                | 365             | 408              | 234          |
| 0.5                                                 | B-NC0.5     |                                | 370             | 415              | 233          |
| Solution-blended nylon 66/CSW composites            |             |                                |                 |                  |              |
| 0.1                                                 | B-NS0.1     | 33,500                         | 371             | 422              | 232          |
| 0.2                                                 | B-NS0.2     |                                | 384             | 436              | 233          |
| 0.3                                                 | B-NS0.3     |                                | 379             | 436              | 233          |
| 0.4                                                 | B-NS0.4     |                                | 379             | 451              | 234          |
| 0.5                                                 | B-NS0.5     |                                | 378             | 460              | 234          |

<sup>a</sup>Viscosity average molecular weight. <sup>b</sup>Degradation temperature at 5% weight loss. <sup>c</sup>Degradation temperature at maximum weight loss. <sup>d</sup>Crystallization temperature. <sup>e</sup>Cellulose nanocrystal.

<sup>f</sup>Chitosan nanowhisker.

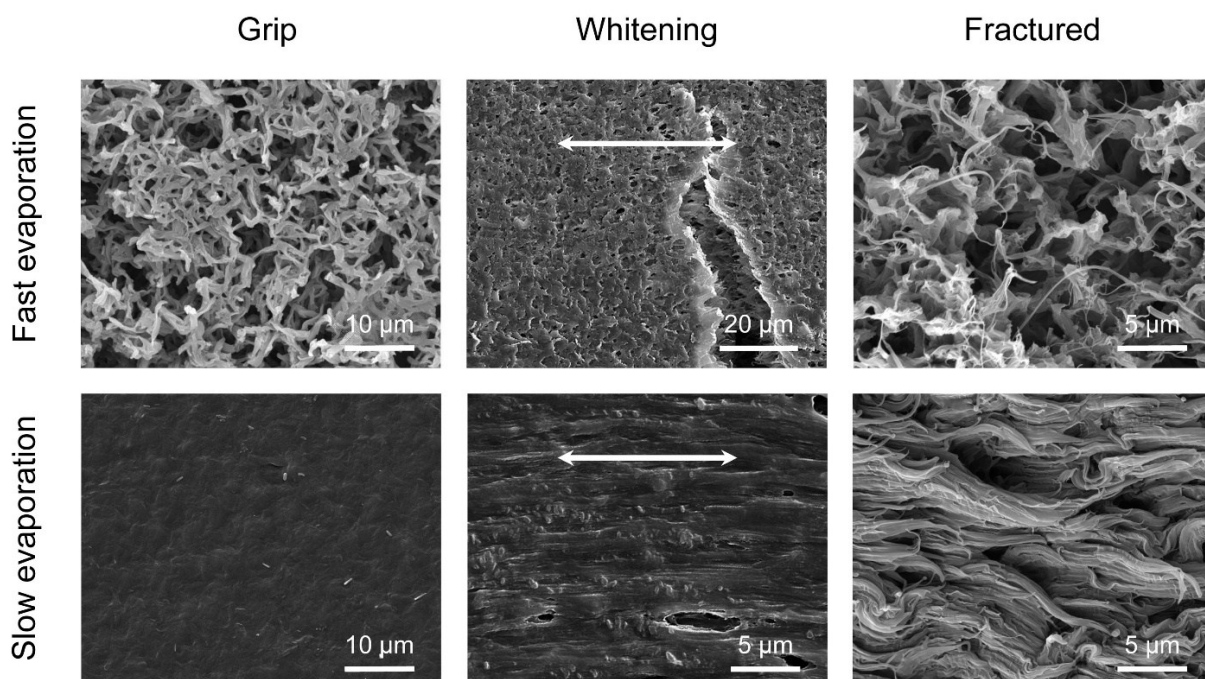

**Fig. S2** SEM images of executed dumbbell-shaped test specimens, which show the difference in morphology at the grip, whitening (necking), and fractured cross-section positions of neat nylon films obtained from fast and slow evaporation of formic acid. White arrows indicate the tensile force direction.

In Fig. S2, SEM images of representative tensile specimens of the two films are shown. The fast-evaporated film is denoted by F\_Ny66, and the slow-evaporated film is denoted by Ny66. The surface of the F\_Ny66 film was highly porous, and the sizes of the macropores ranged  $\sim 3\text{--}7\ \mu\text{m}$ . In contrast, the Ny66 film displayed a continuous surface. Investigation of the tensile-induced whitening deformation area and the fractured surface provided further information on the arrangement of nylon fibers in the two samples. The F\_Ny66 tensile specimen showed the formation of large cracks, which were noticeable in the whitening region. Furthermore, the polymer fibers were randomly entangled with each other, as revealed in the fractured surface. However, the Ny66 sample showed a regular alignment of nylon fibers stretched along the tensile axis. It is speculated that the rapid evaporation of solvents during film formation did not provide sufficient time for the rearrangement and assembly of the nylon 66 strands in an ordered fashion.

**Table S2** Tensile properties of nylon 66 nanocomposites.

| Sample code <sup>a</sup>                 | Young's modulus (E, GPa) | Ultimate tensile strength ( $\sigma$ , MPa) | Elongation at break ( $\epsilon_b$ , %) | Toughness (U, MJ m <sup>-3</sup> ) |
|------------------------------------------|--------------------------|---------------------------------------------|-----------------------------------------|------------------------------------|
| Ny                                       | 1.4 ± 0.1                | 61 ± 3.6                                    | 93 ± 4.5                                | 50 ± 2.8                           |
| C_Ny <sup>b</sup>                        | 1.6 ± 0.1                | 67 ± 2.3                                    | 99 ± 10                                 | 54 ± 5.1                           |
| <i>In situ</i> nylon 66/CNC composites   |                          |                                             |                                         |                                    |
| I-NC0.1                                  | 1.5 ± 0.1                | 69 ± 4.2                                    | 86 ± 4.3                                | 54 ± 3.1                           |
| I-NC0.2                                  | 1.8 ± 0.1                | 76 ± 2.2                                    | 64 ± 3.7                                | 41 ± 3.8                           |
| I-NC0.3                                  | 2.0 ± 0.1                | 89 ± 3.4                                    | 59 ± 3.0                                | 41 ± 1.9                           |
| I-NC0.4                                  | 2.2 ± 0.1                | 100 ± 5.2                                   | 48 ± 3.4                                | 39 ± 3.3                           |
| I-NC0.5                                  | 2.1 ± 0.2                | 89 ± 7.6                                    | 39 ± 3.3                                | 30 ± 4.3                           |
| <i>In situ</i> nylon 66/CSW composites   |                          |                                             |                                         |                                    |
| I-NS0.1                                  | 1.6 ± 0.1                | 76 ± 7.1                                    | 39 ± 14                                 | 26 ± 9.7                           |
| I-NS0.2                                  | 1.9 ± 0.1                | 78 ± 3.3                                    | 24 ± 9.6                                | 18 ± 9.0                           |
| I-NS0.3                                  | 2.6 ± 0.1                | 97 ± 3.2                                    | 27 ± 6.5                                | 23 ± 6.2                           |
| I-NS0.4                                  | 2.6 ± 0.0                | 106 ± 2.0                                   | 30 ± 3.0                                | 28 ± 4.1                           |
| I-NS0.5                                  | -                        | -                                           | -                                       | -                                  |
| Solution-blended nylon 66/CNC composites |                          |                                             |                                         |                                    |
| B-NC0.1                                  | 1.5 ± 0.1                | 70 ± 4.2                                    | 78 ± 4.3                                | 49 ± 2.6                           |
| B-NC0.2                                  | 1.6 ± 0.1                | 73 ± 5.6                                    | 79 ± 4.9                                | 47 ± 5.2                           |
| B-NC0.3                                  | 1.6 ± 0.1                | 74 ± 2.5                                    | 75 ± 4.4                                | 45 ± 3.7                           |
| B-NC0.4                                  | 2.0 ± 0.1                | 86 ± 4.4                                    | 63 ± 8.2                                | 47 ± 15                            |
| B-NC0.5                                  | 1.9 ± 0.1                | 85 ± 4.9                                    | 64 ± 6.2                                | 42 ± 5.7                           |

| <b>Sample code<sup>a</sup></b>           | <b>Young's modulus (E, GPa)</b> | <b>Ultimate tensile strength (<math>\sigma</math>, MPa)</b> | <b>Elongation at break (<math>\epsilon_b</math>, %)</b> | <b>Toughness (U, MJ m<sup>-3</sup>)</b> |
|------------------------------------------|---------------------------------|-------------------------------------------------------------|---------------------------------------------------------|-----------------------------------------|
| Solution-blended nylon 66/CSW composites |                                 |                                                             |                                                         |                                         |
| B-NS0.1                                  | 1.4 ± 0.1                       | 72 ± 2.8                                                    | 127 ± 29                                                | 78 ± 17                                 |
| B-NS0.2                                  | 1.6 ± 0.2                       | 72 ± 4.7                                                    | 140 ± 22                                                | 89 ± 17                                 |
| B-NS0.3                                  | 1.7 ± 0.0                       | 78 ± 3.4                                                    | 147 ± 30                                                | 104 ± 22                                |
| B-NS0.4                                  | 1.8 ± 0.1                       | 80 ± 1.4                                                    | 100 ± 34                                                | 71 ± 23                                 |
| B-NS0.5                                  | 2.2 ± 0.0                       | 87 ± 3.0                                                    | 94 ± 16                                                 | 75 ± 13                                 |

<sup>a</sup>Refer to Table S1 for the sample codes. <sup>b</sup>Commercial nylon 66 sourced from Sigma-Aldrich. Data are displayed as means ± standard deviations of at least five specimens tested.

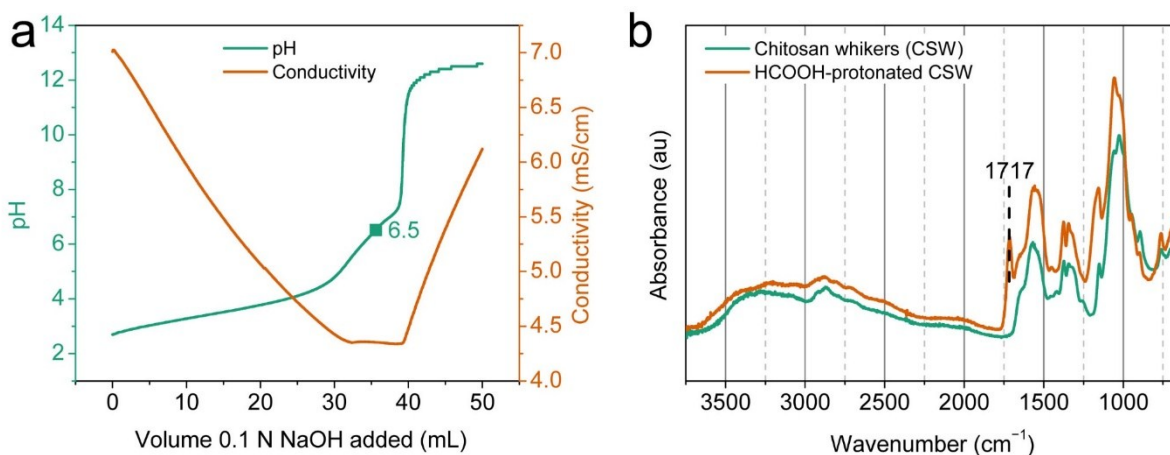

**Fig. S3** Protonation of CSW with formic acid (HCOOH). (a) Titration curves of CSW protonated with formic acid solution (0.1 N,  $pK_a = 3.75$ ). (b) Fourier transformed-infrared (FTIR) spectra of CSW films casted from solvent evaporation of deionized water (pH 7.0) and formic acid.

### 1. Preparation of an acidified CSW suspension

CSW (300 mg) were dispersed in deionized water (40 mL) by homogenization at 5000 rpm using a homogenizer (T 25 ULTRA-TURRAX®, IKA, Germany) for 10 min. The mixture was sonicated at 50% amplitude for 30 min at 25 °C using an Ultrasonic Cleaner (SD-D400H, LKLABKOREA Inc., Korea). After that, formic acid (150  $\mu$ L, Sigma Aldrich, 96%) was added to the resulting suspension under magnetic stirring for 24 h to ensure complete protonation of CSW. The concentration of formic acid in the suspension was  $\sim 0.1$  N. The initial pH (before titration) of the suspension was 2.64, at which virtually all  $-\text{NH}_2$  groups ( $pK_a$  6.5) of CSW were protonated. The initial conductivity was measured to be  $7.010 \text{ mS cm}^{-1}$  using the 912 conductometer (Metrohm, Switzerland), which indicated the dominance of  $\text{H}^+$ .

### 2. Titration of the CSW suspension with NaOH

A solution of NaOH (50 mL, 0.1 N, Sigma Aldrich) was added to the CSW suspension at a flow rate of  $0.05 \text{ mL min}^{-1}$  using a syringe pump (GELATO, KD Scientific, US). The pH and the conductivity of the suspension were recorded at 30-s intervals and were plotted against the volume of NaOH solution added.

Fig. S3a shows the titration results, where a typical conductometric titration curve of an acidic chitosan dispersion was obtained. The lower segment of the curve is attributed to the neutralization of the protonated amino groups present in CSW.<sup>1</sup> Its midpoint is well-matched with the pKa value (6.5) of chitosan NH<sub>2</sub> (ref.2) that specifies the half-equivalence point on the pH-metric curve.

Pristine films of CSW were prepared by casting in formic acid under a slow solvent evaporation rate and then their attenuated total reflectance Fourier-transformed infrared (ATR-FTIR) spectrum was obtained and was compared with the one acquired for a CSW film casted from water (Fig. S3b). The appearance of the peak at 1717 cm<sup>-1</sup>, which is characteristic of the formic acid's C=O stretching, in the formic acid-casted film indicated the protonation of the CSW's surface amino groups. Ionic interactions between NH<sub>3</sub><sup>+</sup> and COO<sup>-</sup> would reduce the hydrogen bonding capability of CSW with the nylon matrix, which resulted in a weaker matrix-filler interaction that led to a lower  $E$  and a higher  $\epsilon_b$  of the B-NS series, compared to the other composites.



**Table S3** Comparison of the ultimate tensile strength ( $\sigma$ ) and elongation at break ( $\epsilon_b$ ) of polyamide (nylon) nanocomposites in this study with reported polyamide composites.

| Filler (natural organic nanofillers) | Polyamide (PA) | Processing       | Ultimate tensile strength ( $\sigma$ ) |                           |                                |                          |                                                                         | Elongation at break ( $\epsilon_b$ ) |                                 |                                   |                              |                                                                             | Ref.      |
|--------------------------------------|----------------|------------------|----------------------------------------|---------------------------|--------------------------------|--------------------------|-------------------------------------------------------------------------|--------------------------------------|---------------------------------|-----------------------------------|------------------------------|-----------------------------------------------------------------------------|-----------|
|                                      |                |                  | Filler content (wt%)                   | $\sigma$ of neat PA (MPa) | $\sigma$ of PA composite (MPa) | $\sigma$ increase (fold) | $\sigma$ increase per unit filler loading [(fold-1) wt% <sup>-1</sup> ] | Filler content (wt%)                 | $\epsilon_b$ of pristine PA (%) | $\epsilon_b$ of PA composites (%) | $\epsilon_b$ increase (fold) | $\epsilon_b$ increase per unit filler loading [(fold-1) wt% <sup>-1</sup> ] |           |
| CNC <sup>a</sup>                     | PA66           | Solution casting | 0.4                                    | 61                        | 100                            | 1.64                     | 1.60                                                                    | 0.4                                  | 93                              | 48                                | 0.52                         | -1.2                                                                        | This work |
| CNC <sup>b</sup>                     |                |                  | 0.4                                    | 61                        | 86                             | 1.41                     | 1.03                                                                    | 0.4                                  | 93                              | 63                                | 0.68                         | -0.8                                                                        |           |
| CSW <sup>a</sup>                     |                |                  | 0.4                                    | 61                        | 106                            | 1.74                     | 1.85                                                                    | 0.4                                  | 93                              | 30                                | 0.32                         | -1.7                                                                        |           |
| CSW <sup>b</sup>                     |                |                  | 0.5                                    | 61                        | 87                             | 1.43                     | 0.86                                                                    | 0.3                                  | 93                              | 147                               | 1.6                          | 1.9                                                                         |           |

<sup>a</sup>*In situ* polymerized PA66 nanocomposites. <sup>b</sup>Solution-blended PA66 nanocomposites.

**Table S3** Comparison of ultimate tensile strength ( $\sigma$ ) and elongation at break ( $\epsilon_b$ ) of polyamide nanocomposites in this study with other previous reported polyamide composites (*continued*).

| Filler (natural organic fillers)       | Polyamide (PA) | Processing | Ultimate tensile strength ( $\sigma$ ) |                           |                                |                          |                                                                         | Elongation at break ( $\epsilon_b$ ) |                                 |                                   |                              |                                                                             | Ref. |
|----------------------------------------|----------------|------------|----------------------------------------|---------------------------|--------------------------------|--------------------------|-------------------------------------------------------------------------|--------------------------------------|---------------------------------|-----------------------------------|------------------------------|-----------------------------------------------------------------------------|------|
|                                        |                |            | Filler content (wt%)                   | $\sigma$ of neat PA (MPa) | $\sigma$ of PA composite (MPa) | $\sigma$ increase (fold) | $\sigma$ increase per unit filler loading [(fold-1) wt% <sup>-1</sup> ] | Filler content (wt%)                 | $\epsilon_b$ of pristine PA (%) | $\epsilon_b$ of PA composites (%) | $\epsilon_b$ increase (fold) | $\epsilon_b$ increase per unit filler loading [(fold-1) wt% <sup>-1</sup> ] |      |
| Cellulose whiskers <sup>c</sup>        | PA6            | Injection  | 1.0                                    | 54                        | 50                             | 0.93                     | -0.07                                                                   | 1.0                                  | 60                              | 33                                | 0.55                         | -0.45                                                                       | 3    |
| Coated cellulose whiskers <sup>d</sup> |                |            | 1.0                                    | 54                        | 52                             | 0.96                     | -0.04                                                                   | 1.0                                  | 60                              | 73                                | 1.22                         | 0.22                                                                        |      |
| Nanocrystalline cellulose <sup>e</sup> |                |            | 3.0                                    | 67                        | 74                             | 1.1                      | 0.03                                                                    | 3.0                                  | 336                             | 55                                | 0.16                         | -0.28                                                                       | 4    |
| Coconut shell particles <sup>f</sup>   |                |            | 15                                     | 70                        | 77                             | 1.1                      | 0.01                                                                    | No data                              |                                 |                                   |                              |                                                                             | 5    |
| ECO Bright fibers <sup>g</sup>         |                |            | 30                                     | 72                        | 118                            | 1.64                     | 0.02                                                                    | No data                              |                                 |                                   |                              |                                                                             | 6    |
| TerraCel™ <sup>h</sup>                 |                |            | 30                                     | 72                        | 120                            | 1.67                     | 0.02                                                                    | No data                              |                                 |                                   |                              |                                                                             |      |
| Stone groundwood fibers <sup>i</sup>   | PA11           |            | 50                                     | 38                        | 64                             | 1.67                     | 0.01                                                                    | 50                                   | 25                              | 3.7                               | 0.15                         | -0.02                                                                       | 7    |

<sup>c</sup>Obtained from commercial cotton fibers through acid hydrolysis using H<sub>2</sub>SO<sub>4</sub>. <sup>d</sup>Coated with PA6 by dissolving in formic acid followed by solvent evaporation. <sup>e</sup>Produced by acid hydrolysis of a commercial bleached softwood Kraft pulp. <sup>f</sup>Contains 49.8% cellulose and 25.1% lignin. <sup>g</sup>Softwood wood pulp containing 90–100% cellulose. <sup>h</sup>Hardwood wood pulp containing 97–100% cellulose. <sup>i</sup>From softwood (*Pinus radiata*).

**Table S3** Comparison of ultimate tensile strength ( $\sigma$ ) and elongation at break ( $\epsilon_b$ ) of polyamide nanocomposites in this study with other previous reported polyamide composites (*continued*).

| Filler (carbon-based materials)       | Polyamide (PA) | Processing       | Ultimate tensile strength ( $\sigma$ ) |                           |                                |                          |                                                                         | Elongation at break ( $\epsilon_b$ ) |                                 |                                   |                              |                                                                             | Ref. |
|---------------------------------------|----------------|------------------|----------------------------------------|---------------------------|--------------------------------|--------------------------|-------------------------------------------------------------------------|--------------------------------------|---------------------------------|-----------------------------------|------------------------------|-----------------------------------------------------------------------------|------|
|                                       |                |                  | Filler content (wt%)                   | $\sigma$ of neat PA (MPa) | $\sigma$ of PA composite (MPa) | $\sigma$ increase (fold) | $\sigma$ increase per unit filler loading [(fold-1) wt% <sup>-1</sup> ] | Filler content (wt%)                 | $\epsilon_b$ of pristine PA (%) | $\epsilon_b$ of PA composites (%) | $\epsilon_b$ increase (fold) | $\epsilon_b$ increase per unit filler loading [(fold-1) wt% <sup>-1</sup> ] |      |
| Graphene <sup>e</sup>                 | PA66           | Solution casting | 1.0                                    | 22                        | 33                             | 1.5                      | 0.5                                                                     | 1.0                                  | 40                              | 33                                | 0.83                         | -0.18                                                                       | 8    |
| Graphene <sup>t</sup>                 | PA6            |                  | 3.0                                    | 68                        | 109                            | 1.60                     | 0.20                                                                    | 3.0                                  | 75                              | 45                                | 0.6                          | -0.13                                                                       | 9    |
| Graphene oxide (GO) <sup>l</sup>      |                |                  | 1.0                                    | 51                        | 96                             | 1.88                     | 0.88                                                                    | 1.0                                  | 27                              | 13                                | 0.48                         | -0.52                                                                       | 10   |
| Reduced GO <sup>m</sup>               | PA12           | Hot-pressed      | 4.0                                    | 52                        | 43                             | 0.82                     | -0.04                                                                   | 4.0                                  | 254                             | 6.8                               | 0.03                         | -0.24                                                                       | 11   |
| Multi-walled carbon nanotubes (MWNT)  | PA610          |                  | 1.5                                    | 36                        | 51                             | 1.43                     | 0.29                                                                    | 1.5                                  | 10                              | 13                                | 1.3                          | 0.2                                                                         | 12   |
|                                       | PA66           |                  | 0.5                                    | 53                        | 65                             | 1.23                     | 0.45                                                                    | 0.5                                  | 11                              | 8.5                               | 0.77                         | -0.45                                                                       | 13   |
|                                       |                |                  | 0.5                                    | 53                        | 75                             | 1.42                     | 0.84                                                                    | 0.5                                  | 11                              | 9                                 | 0.82                         | -0.36                                                                       |      |
| MWNT <sup>o</sup>                     | PA6            | Injection        | 1.0                                    | 62                        | 59                             | 0.95                     | -0.05                                                                   | 1.0                                  | 235                             | 133                               | 0.57                         | -0.43                                                                       | 14   |
| Functionalized MWNT <sup>p</sup>      |                | Hot-pressed      | 1.0                                    | 18                        | 40                             | 2.24                     | 1.24                                                                    | 1.0                                  | >150                            | 125                               | <0.83                        | <-0.17                                                                      | 15   |
| Single walled carbon nanotubes (SWNT) |                |                  | 1.5                                    | 66                        | 50                             | 0.76                     | -0.16                                                                   | 1.5                                  | 350                             | 68                                | 0.19                         | -0.54                                                                       | 16   |
| SWNT <sup>q</sup>                     |                |                  | 1.5                                    | 66                        | 50                             | 0.76                     | -0.16                                                                   | 2.5                                  | 350                             | 307                               | 0.88                         | -0.05                                                                       |      |
| SWNT                                  | PA610          | Melt spinning    | 1.0                                    | 67                        | 79                             | 1.18                     | 0.18                                                                    | 1.0                                  | 440                             | 262                               | 0.60                         | -0.40                                                                       | 17   |
| Functionalized                        |                |                  | 1.0                                    | 67                        | 168                            | 2.51                     | 1.51                                                                    | 1.0                                  | 440                             | 290                               | 0.66                         | -0.34                                                                       |      |

| Filler (carbon-based materials) | Polyamide (PA) | Processing | Ultimate tensile strength ( $\sigma$ ) |                           |                                |                          |                                                                         | Elongation at break ( $\epsilon_b$ ) |                                 |                                   |                              |                                                                             | Ref. |
|---------------------------------|----------------|------------|----------------------------------------|---------------------------|--------------------------------|--------------------------|-------------------------------------------------------------------------|--------------------------------------|---------------------------------|-----------------------------------|------------------------------|-----------------------------------------------------------------------------|------|
|                                 |                |            | Filler content (wt%)                   | $\sigma$ of neat PA (MPa) | $\sigma$ of PA composite (MPa) | $\sigma$ increase (fold) | $\sigma$ increase per unit filler loading [(fold-1) wt% <sup>-1</sup> ] | Filler content (wt%)                 | $\epsilon_b$ of pristine PA (%) | $\epsilon_b$ of PA composites (%) | $\epsilon_b$ increase (fold) | $\epsilon_b$ increase per unit filler loading [(fold-1) wt% <sup>-1</sup> ] |      |
| SWNT <sup>r</sup>               |                |            | 1.0                                    | 67                        | 177                            | 2.64                     | 1.64                                                                    | 1.0                                  | 440                             | 368                               | 0.84                         | -0.16                                                                       |      |
| Carbon fiber                    | PA6            | Injection  | 20                                     | 52                        | 111                            | 2.15                     | 0.06                                                                    | 20                                   | 276                             | 3.4                               | 0.01                         | -0.05                                                                       | 18   |

<sup>j</sup>Oxygen content is less than 1%. <sup>k</sup>Synthesized from graphene-ZnO composites by treatment with concentrated HCl solution. <sup>l</sup>Prepared from graphite using a modified Hummers and Offeman's method. Oxidizing agents used were NaNO<sub>3</sub>, H<sub>2</sub>SO<sub>4</sub>, KMnO<sub>4</sub>, and H<sub>2</sub>O<sub>2</sub>. <sup>m</sup>Prepared through thermal treatment of GO surface. The GO was prepared from graphite by modified Hummers' method using H<sub>2</sub>SO<sub>4</sub> and KMnO<sub>4</sub> as oxidizing agents. <sup>n</sup>Amination using hexamethylenediamine. <sup>o</sup>Encapsulated with poly(*n*-butylacrylate). <sup>p</sup>Synthesized by catalytic chemical vapor deposition of methane on Co-Mo/MgO catalysts and functionalized by oxidation with 2.6 M HNO<sub>3</sub> solution. <sup>q</sup>Modified with styrene-maleic anhydride. <sup>r</sup>Functionalized with long-chain carboxylic acid groups, -(CH<sub>2</sub>)<sub>n</sub>-COOH (n = 4 and 9).

**Table S3** Comparison of ultimate tensile strength ( $\sigma$ ) and elongation at break ( $\epsilon_b$ ) of polyamide nanocomposites in this study with other previous reported polyamide composites (*continued*).

| Filler (Clays and others filler types)                  | Polyamide (PA) | Processing     | Ultimate tensile strength ( $\sigma$ ) |                           |                                |                          |                                                                         | Elongation at break ( $\epsilon_b$ ) |                                 |                                   |                              |                                                                             | Ref   |       |    |
|---------------------------------------------------------|----------------|----------------|----------------------------------------|---------------------------|--------------------------------|--------------------------|-------------------------------------------------------------------------|--------------------------------------|---------------------------------|-----------------------------------|------------------------------|-----------------------------------------------------------------------------|-------|-------|----|
|                                                         |                |                | Filler content (wt%)                   | $\sigma$ of neat PA (MPa) | $\sigma$ of PA composite (MPa) | $\sigma$ increase (fold) | $\sigma$ increase per unit filler loading [(fold-1) wt% <sup>-1</sup> ] | Filler content (wt%)                 | $\epsilon_b$ of pristine PA (%) | $\epsilon_b$ of PA composites (%) | $\epsilon_b$ increase (fold) | $\epsilon_b$ increase per unit filler loading [(fold-1) wt% <sup>-1</sup> ] |       |       |    |
| Organoclay, Nanomer® I.34TCN <sup>s</sup>               | PA66           | Injection      | 5.0                                    | 73                        | 83                             | 1.14                     | 0.03                                                                    | No data                              |                                 |                                   |                              |                                                                             | 19    |       |    |
| Cloisite 30B <sup>t</sup>                               | PA6            | Melt extrusion | 5.0                                    | 28                        | 36                             | 1.29                     | 0.06                                                                    | No data                              |                                 |                                   |                              |                                                                             | 20    |       |    |
| Natural clay                                            |                | Injection      | 8.0                                    | 66                        | 76                             | 1.15                     | 0.02                                                                    | No data                              |                                 |                                   |                              |                                                                             | 21    |       |    |
| Halloysite A <sup>u</sup>                               | PA11           | Injection      | 2.0                                    | 72                        | 80                             | 1.12                     | 0.06                                                                    | 2.0                                  | 99                              | 186                               | 1.9                          | 0.44                                                                        | 22    |       |    |
| Montmorillonite clay (M1030D)                           |                |                | 3.0                                    | 52                        | 74                             | 1.42                     | 0.14                                                                    | 3.0                                  | 276                             | 3.9                               | 0.01                         | -0.33                                                                       | 18    |       |    |
| Halloysite <sup>v</sup>                                 |                |                | 6.0                                    | 44                        | 54                             | 1.24                     | 0.04                                                                    | 6.0                                  | 254                             | 235                               | 0.93                         | -0.01                                                                       | 23    |       |    |
| Nano-SiO <sub>2</sub> <sup>w</sup>                      |                |                | PA66                                   | 3.0                       | 72                             | 79                       | 1.10                                                                    | 0.03                                 | No data                         |                                   |                              |                                                                             |       | 24    |    |
| Glass fiber <sup>x</sup>                                |                |                | PA6                                    | Injection                 | 30                             | 52                       | 96                                                                      | 1.85                                 | 0.03                            | 30                                | 276                          | 5.6                                                                         | 0.02  | -0.03 | 18 |
| Glass fibers/Montmorillonite clay (M1030D) <sup>y</sup> |                |                |                                        |                           | 30                             | 52                       | 107                                                                     | 2.06                                 | 0.04                            | 30                                | 276                          | 2.4                                                                         | 0.009 | -0.03 | 18 |

<sup>s</sup>Surface modified Montmorillonite mineral with a mean particle size of 16–22  $\mu\text{m}$ . <sup>t</sup>Natural Montmorillonite-layered silicate modified with a ternary ammonium salt. <sup>u</sup>Tubular form with a cation exchange capacity of around 10 meq/g. <sup>v</sup>Average diameter of 80 nm, length of about 1.2  $\mu\text{m}$ , and density of 2.5 g cm<sup>-3</sup>. <sup>w</sup>Obtained using sodium metasilicate as the monomer, silane coupling agent as a chain terminator, and 3-aminopropyltriethoxysilane as a surface modifier. <sup>x</sup>6 mm long. <sup>y</sup>Glass fibers content: 30 wt.%; Clay content: 3 wt.

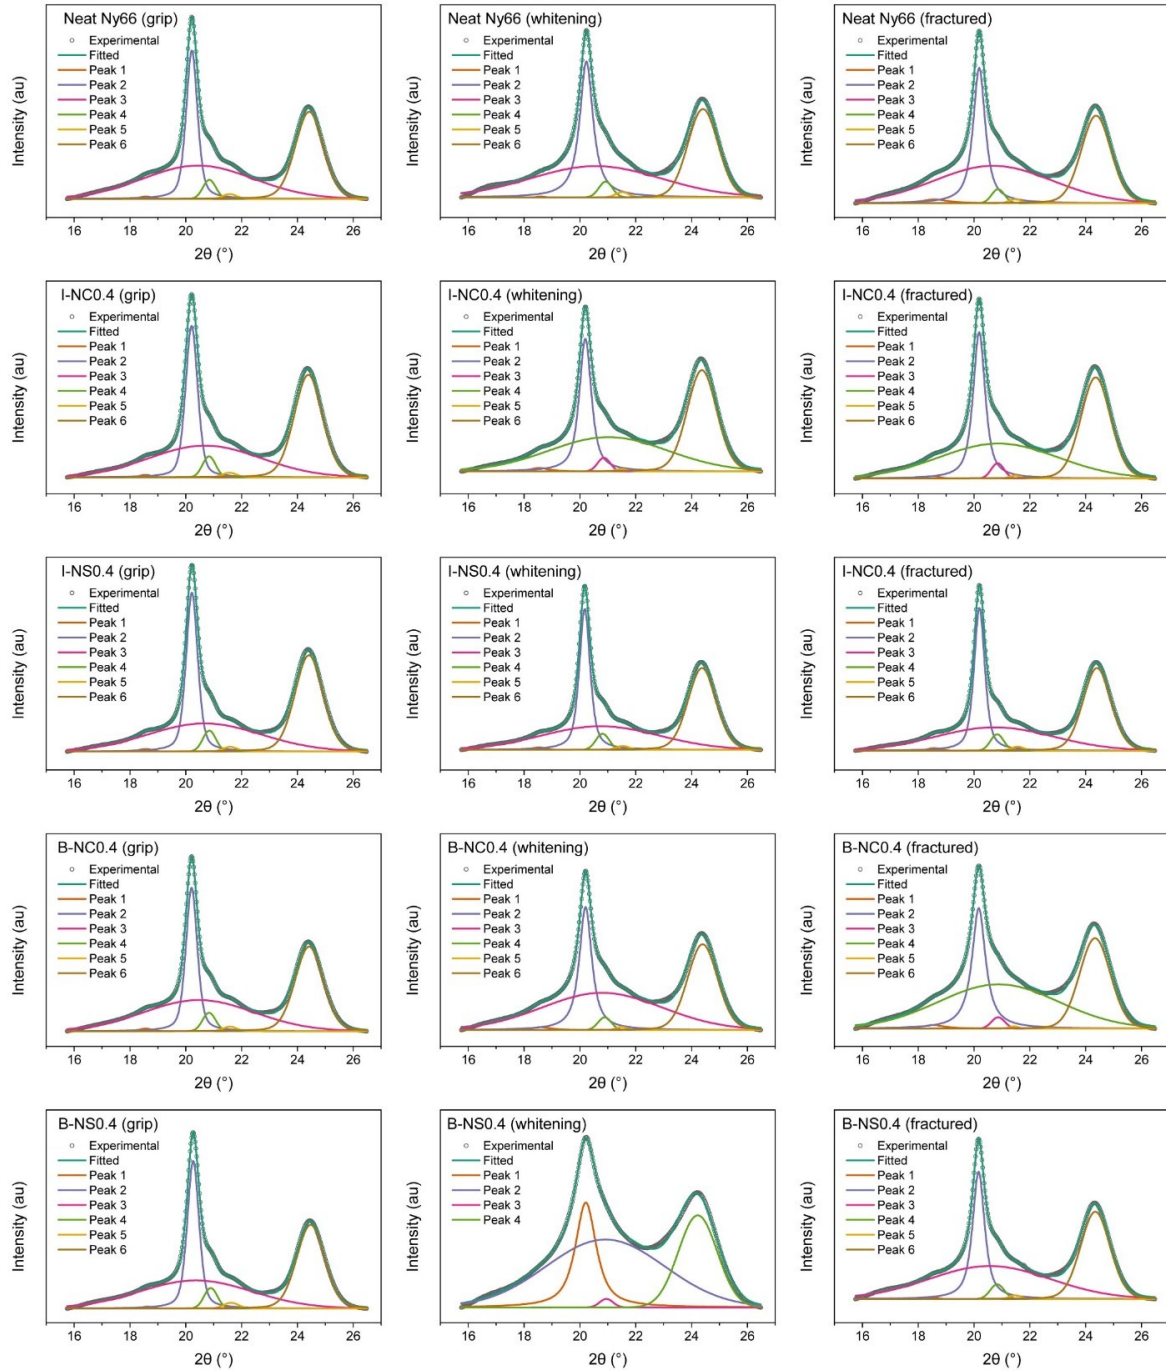

**Fig. S4** 1D WAXS patterns and peak deconvolution of (from top row to bottom row) neat Ny66, I-NC0.4, I-NS0.4, B-NC0.4, and B-NS0.4 films at filler loading of 0.4 wt% at (from left to right) grip, whitening (necking), and fractured cross-section positions.

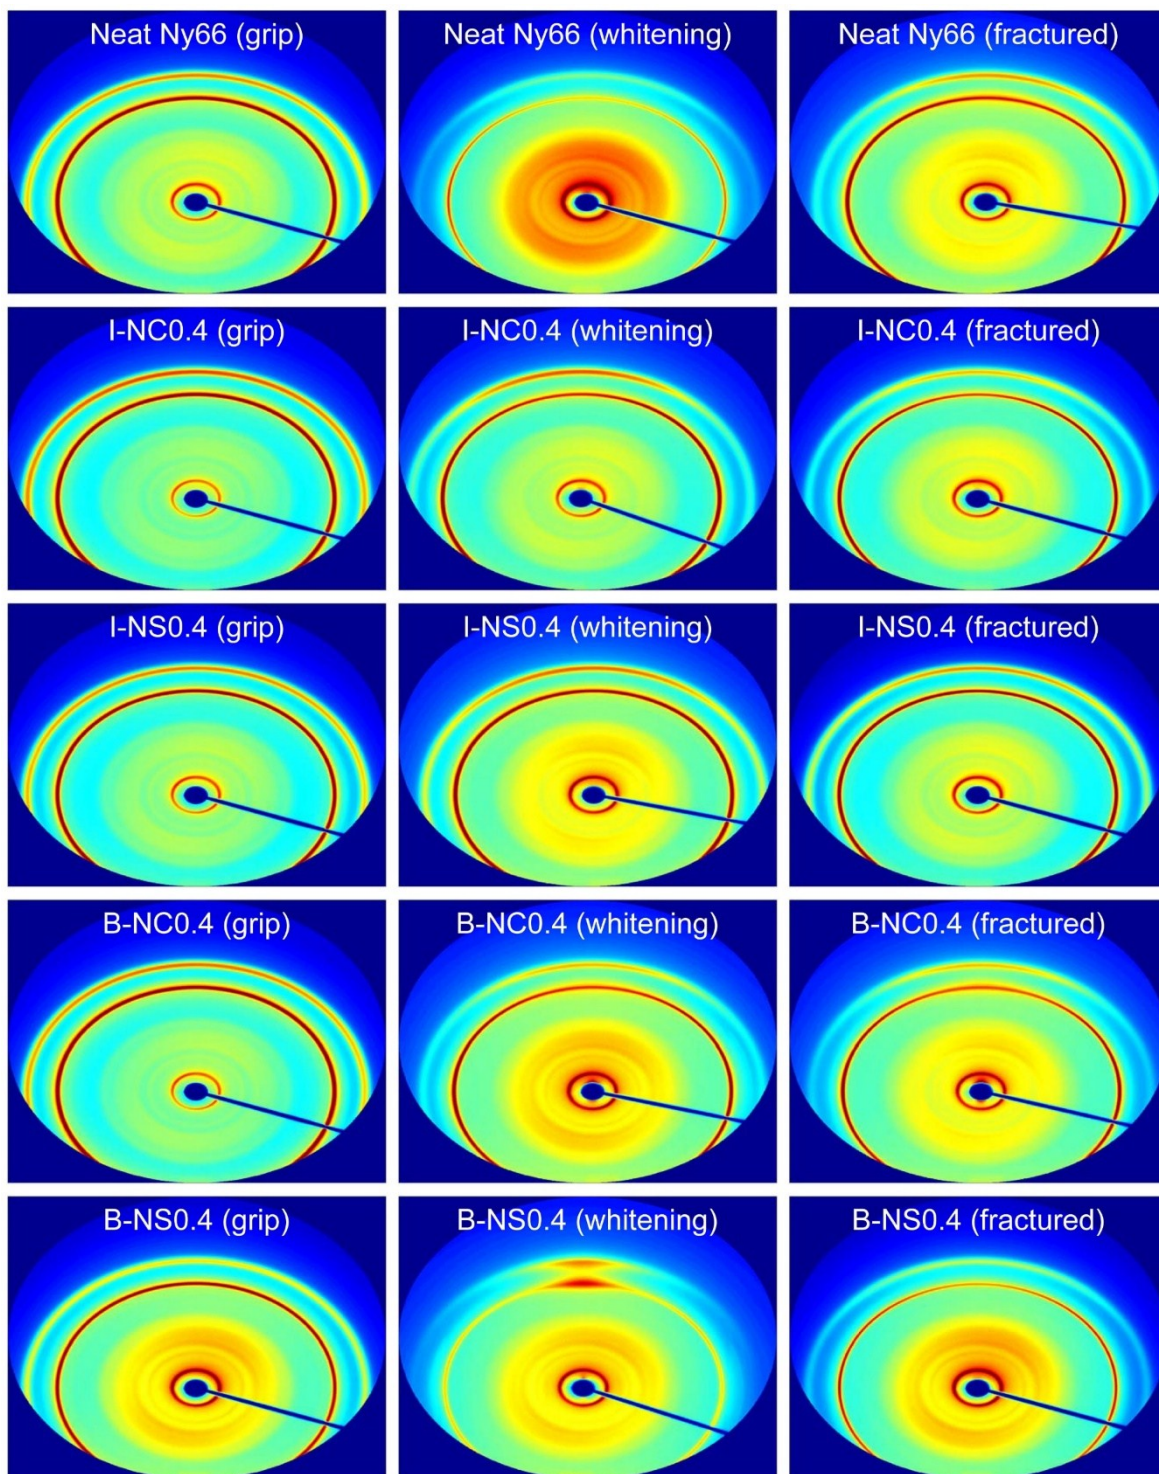

**Fig. S5** 2D WAXS patterns of (from top row to bottom row) neat Ny66, I-NC0.4, I-NS0.4, B-NC0.4, and B-NS0.4 films at filler loading of 0.4 wt% at (from left to right) grip, whitening (necking), and fractured cross-section positions.

**Table S4** FTIR spectral band assignments of nylon 66 nanocomposites.

| Wavenumbers (cm <sup>-1</sup> ) | Assignments                                                                                                        | Refs.      |
|---------------------------------|--------------------------------------------------------------------------------------------------------------------|------------|
| 1631                            | Amide I (mainly C=O stretching of hydrogen-bonded C=O groups, in plane NH deformation, and possibly CN stretching) | 25–28      |
| 1623–1611                       | Shifting of amide I due to an increase in hydrogen bonding                                                         |            |
| 1534                            | Amide II (mainly in-plane N–H bending of hydrogen-bonded N–H groups, CO stretching, and CN stretching)             | 25–28      |
| 1531–1521                       | Shifting of amide II due to an increase in hydrogen bonding                                                        |            |
| 1473                            | NH-vicinal CH <sub>2</sub> scissoring, <i>trans</i> conformation, regularity                                       | 26, 29     |
|                                 | Crystallinity                                                                                                      | 30         |
| 1466                            | All NH-non-vicinal CH <sub>2</sub> scissoring                                                                      | 26, 29     |
| 1438                            | Coincidence of NH-vicinal and CO-vicinal CH <sub>2</sub> scissoring                                                | 26, 29     |
| 1417                            | CO-vicinal CH <sub>2</sub> scissoring, <i>trans</i> conformation, regularity                                       | 26, 29     |
| 1371                            | Amide III (CN stretch, in plane NH deformation), coupled with hydrocarbon skeleton                                 | 25, 26     |
|                                 | CH <sub>3</sub> end group symmetric deformation                                                                    | 26         |
| 1332                            | Regular-folded chains                                                                                              | 25, 26     |
|                                 | Crystallinity (Brill band)                                                                                         | 31–33      |
| 1307                            | CH <sub>2</sub> twisting                                                                                           | 26         |
| 1278                            | Amide III (CN stretch, in plane NH deformation), coupled with hydrocarbon skeleton                                 | 25, 26     |
| 1226                            | Regular-folded chains                                                                                              | 26, 31, 32 |
| 1200                            | Amide III (CN stretch, in plane NH deformation), coupled with hydrocarbon skeleton                                 | 25, 26     |
|                                 | Crystallinity                                                                                                      | 30, 32–35  |
| 1060; 1070                      | Crystallinity                                                                                                      | 33         |
|                                 | Regularity                                                                                                         | 30         |
| 1040; 1013                      | Crystallinity (Brill bands)                                                                                        | 33         |
| 937                             | Crystallinity                                                                                                      | 30, 34–36  |
| 907                             | (Possible) crystallinity                                                                                           | 30, 34, 35 |



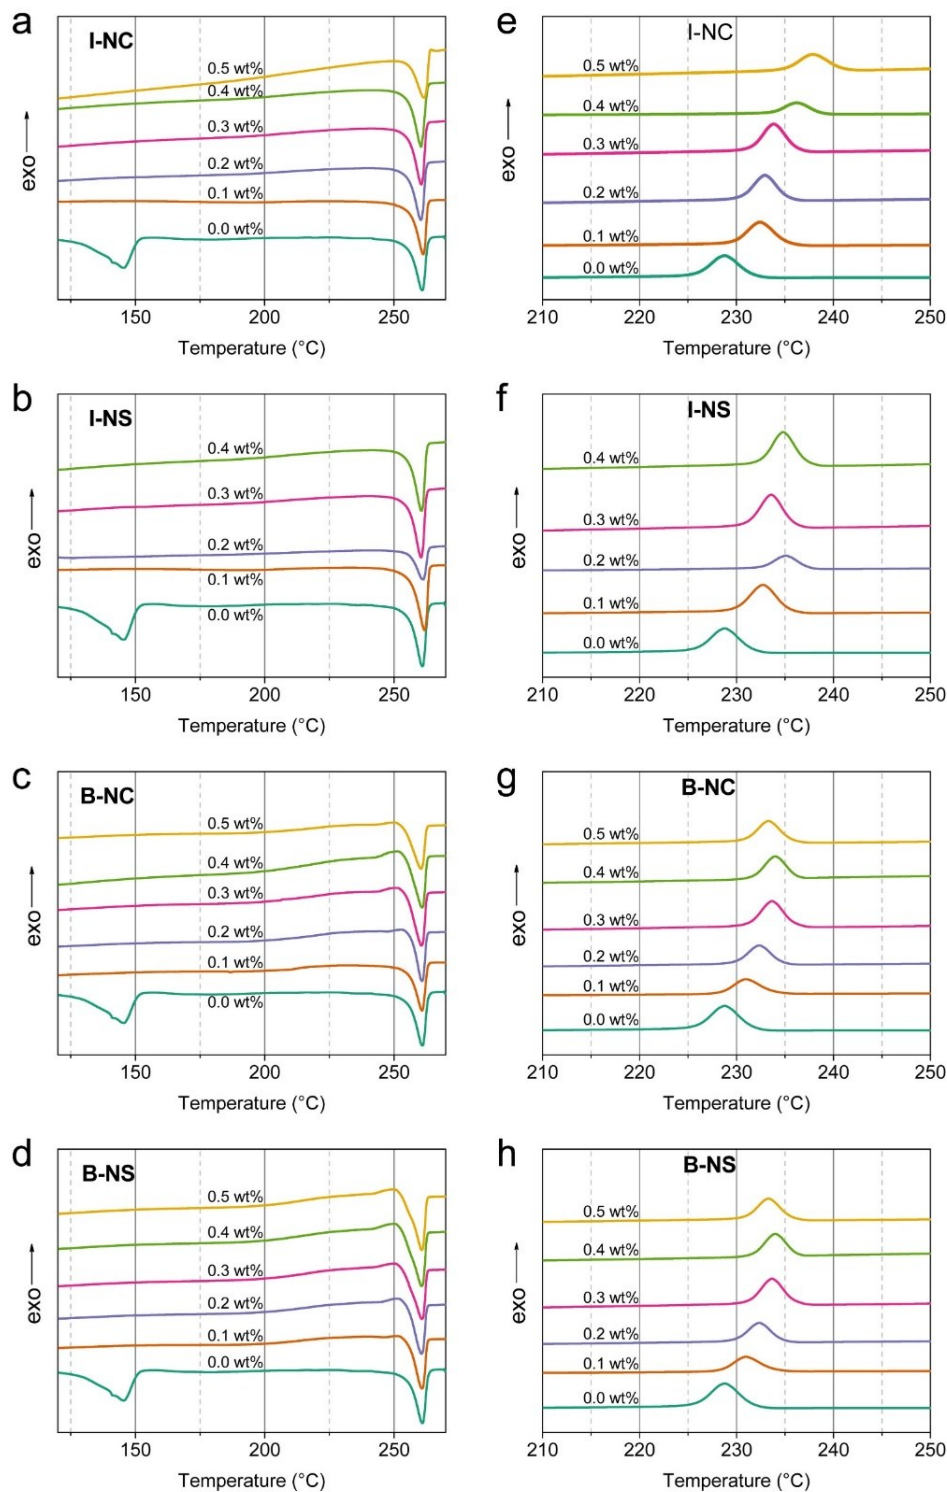

**Fig. S6** Differential scanning calorimetry (DSC) thermograms showing the 1<sup>st</sup> heating run of (a) *in situ* Ny66/CNC (I-NC), (b) *in situ* Ny66/CSW (I-NS), (c) solution-blended Ny66/CNC (B-NC), and (d) solution-blended Ny66/CSW (B-NS) nanocomposite films. DSC thermograms showing the cooling runs of (e) I-NC, (f) I-NS, (g) B-NC, and (h) B-NS nanocomposite films.

**Table S5** Crystallinity of nylon 66 nanocomposites based on heat of melting obtained from the first heating of differential scanning calorimetric data.

| Sample code <sup>a</sup> | Heat of melting <sup>b</sup> ( $\Delta H_m$ , J g <sup>-1</sup> ) | Crystallinity X (%) |
|--------------------------|-------------------------------------------------------------------|---------------------|
| Ny66                     | 54.90                                                             | 29.14               |
| I-NC0.1                  | 62.08                                                             | 32.95               |
| I-NC0.2                  | 63.80                                                             | 33.86               |
| I-NC0.3                  | 63.92                                                             | 33.93               |
| I-NC0.4                  | 63.41                                                             | 33.66               |
| I-NC0.5                  | 64.76                                                             | 34.37               |
| I-NS0.1                  | 63.81                                                             | 33.87               |
| I-NS0.2                  | 61.07                                                             | 32.42               |
| I-NS0.3                  | 61.47                                                             | 32.63               |
| I-NS0.4                  | 62.39                                                             | 33.12               |
| B-NC0.1                  | 71.11                                                             | 37.74               |
| B-NC0.2                  | 69.49                                                             | 36.88               |
| B-NC0.3                  | 68.94                                                             | 36.59               |
| B-NC0.4                  | 72.29                                                             | 38.37               |
| B-NC0.5                  | 69.71                                                             | 37.00               |
| B-NS0.1                  | 70.07                                                             | 37.19               |
| B-NS0.2                  | 71.83                                                             | 38.13               |
| B-NS0.3                  | 69.20                                                             | 36.73               |
| B-NS0.4                  | 71.11                                                             | 37.74               |
| B-NS0.5                  | 70.20                                                             | 37.26               |

<sup>a</sup>Refer to Table S1. <sup>b</sup>The heat of melting of theoretically crystalline nylon 66 is 188.4 J g<sup>-1</sup>. (ref.37)

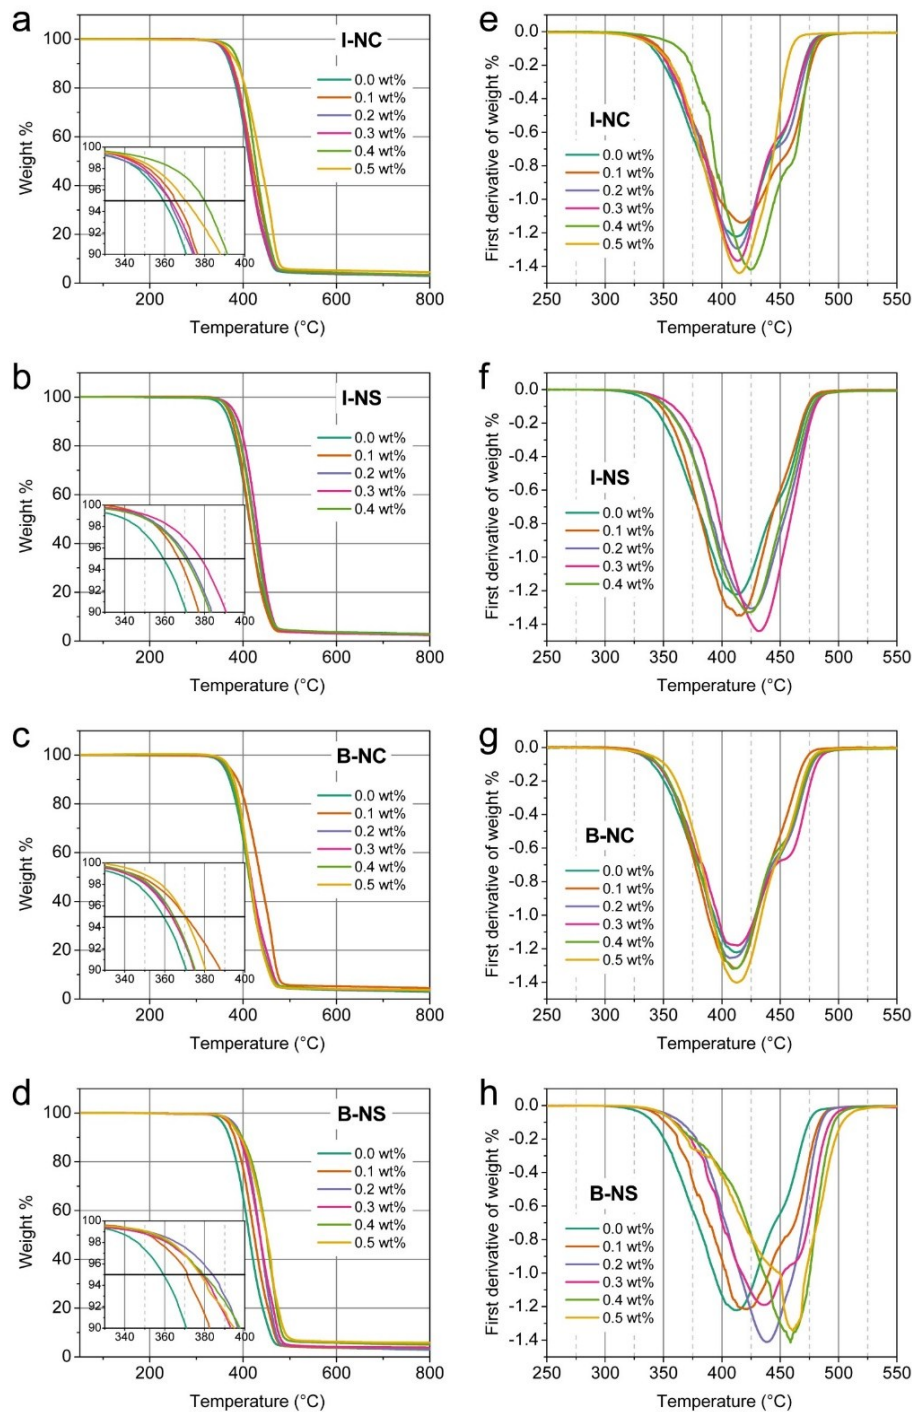

**Fig. S7** Thermogravimetric analysis curves of (a) *in situ* Ny66/CNC (I-NC), (b) *in situ* Ny66/CSW (I-NS), (c) solution-blended Ny66/CNC (B-NC), and (d) solution-blended Ny66/CSW (B-NS) nanocomposite films. Insets: magnified view of the onset thermal degradation. Corresponding differential thermogravimetric (DTG) curves of (e) I-NC, (f) I-NS, (g) B-NC, and (h) B-NS nanocomposite films.

The thermal degradation of pristine nylon 66 and its nanocomposite films was investigated by thermal gravimetric analysis (TGA). The results are shown in Fig. S7, and their degradation temperatures are given in Table S1. The degradation of the pristine film took place over the 350 to 500 °C range. The decomposition temperature for a 5% weight loss ( $T_{d5}$ ) was ~359 °C and the maximum decomposition temperature ( $T_{max}$ ) was ~408 °C; these obtained values are consistent with reported values.<sup>38</sup>

The sulfuric acid-treated cellulose nanocrystals (CNC) have been reported to exhibit two well-separated pyrolysis processes (one between 150 and 290 °C and the other between 320 and 500 °C),<sup>39,40</sup> whereas CSW is known to have one major weight loss decomposition beginning at above 200 °C and peaking at 350 °C.<sup>41</sup> The thermograms of all the composite films were similar to that of the pristine film, indicating no separate degradation stage of either CNC or CSW, regardless of the nanofiller loading level (Fig. S7). This suggests good dispersion and uniform distribution of the nanofiller within the polymer matrix. Although the thermal degradation regimes of both nanofillers are lower than that of the polymer, incorporation of the nanofiller into the polymer matrix even at a low concentration showed an improvement in the thermal stability of the resulting composites.

This thermal stability enhancement is likely attributed to the synergistic effects of filler-matrix interaction through hydrogen bonding or covalent linkage. Furthermore, these interactions were responsible for the uniform heat absorption and the higher energy input requirement for decomposition. They also reduced polymer molecular mobility and prevented the diffusion of formed volatile decomposition products, leading to improved thermal profiles of the composites.<sup>42</sup> Under the same composite synthesis method, CSW appeared to enhance the thermal stability of the composite films, better than that with CNC. An increase by at least 4 °C of the  $T_{d5}$  of the nanocomposites was realized, along with an increase in the  $T_{max}$  values. Interestingly, B-NS samples experienced an unusual elevation in their  $T_{max}$ , reaching as high as 460 °C, 50 °C higher than that of the pristine film (Table S1), which is probably due to ionization of CSW by formic acid during the post-blending.<sup>43</sup> However, no remarkable correlation was found between the filler loading and the thermal properties of the composites because of the involvement of complicated energy dissipating mechanisms of the nanofillers.<sup>44</sup>

## REFERENCES

- 1 Z. M. dos Santos, A. L. P. F. Caroni, M. R. Pereira, D. R. da Silva and J. L. C. Fonseca, *Carbohydr. Res.*, 2009, **344**, 2591–2595.
- 2 C. Lim, D. W. Lee, J. N. Israelachvili, Y. Jho and D. S. Hwang, *Carbohydr. Polym.*, 2015, **117**, 887–894.
- 3 A. C. Corrêa, E. de Moraes Teixeira, V. B. Carmona, K. B. R. Teodoro, C. Ribeiro, L. H. C. Mattoso and J. M. Marconcini, *Cellulose*, 2014, **21**, 311–322.
- 4 H. Yousefian and D. Rodrigue, *Polym. Compos.*, 2016, **37**, 1473–1479.
- 5 S. Savetlana, L. Mulvaney-Johnson, T. Gough and A. Kelly, *Plast. Rubber Compos.*, 2018, **47**, 77–86.
- 6 P. A. de Arcaya, A. Retegi, A. Arbelaiz, J. M. Kenny and I. Mondragon, *Polym. Compos.*, 2009, **30**, 257–264.
- 7 H. Oliver-Ortega, L. A. Granda, F. X. Espinach, J. A. Mendez, F. Julian and P. Mutjé, *Compos. Sci. Technol.*, 2016, **132**, 123–130.
- 8 E. L. Papadopoulou, F. Pignatelli, S. Marras, L. Marini, A. Davis, A. Athanassiou and I. S. Bayer, *RSC Adv.*, 2016, **6**, 6823–6831.
- 9 M. M. Hossain, H. Shima, I. Lee and J. R. Hahn, *J. Appl. Polym. Sci.*, 2017, **134**, 45034.
- 10 X. Zhang, X. Fan, H. Li and C. Yan, *J. Mater. Chem.*, 2012, **22**, 24081–24091.
- 11 A. Dorigato and A. Pegoretti, *Polym. Eng. Sci.*, 2019, **59**, 198–205.
- 12 M. Kang, S. J. Myung and H.-J. Jin, *Polymer*, 2006, **47**, 3961–3966.
- 13 R. Sengupta, A. Ganguly, S. Sabharwal, T. K. Chaki and A. K. Bhowmick, *J. Mater. Sci.*, 2007, **42**, 923–934.
- 14 H. Xia, Q. Wang and G. Qiu, *Chem. Mater.*, 2003, **15**, 3879–3886.
- 15 W. D. Zhang, L. Shen, I. Y. Phang and T. Liu, *Macromolecules*, 2004, **37**, 256–259.
- 16 A. R. Bhattacharyya, P. Pötschke, L. Häußler and D. Fischer, *Macromol. Chem. Phys.*, 2005, **206**, 2084–2095.
- 17 M. Moniruzzaman, J. Chattopadhyay, W. E. Billups and K. I. Winey, *Nano Lett.*, 2007, **7**, 1178–1185.
- 18 S.-H. Wu, F.-Y. Wang, C.-C. M. Ma, W.-C. Chang, C.-T. Kuo, H.-C. Kuan and W.-J. Chen, *Mater. Lett.*, 2001, **49**, 327–333.
- 19 L. Shen, I. Y. Phang, L. Chen, T. Liu and K. Zeng, *Polymer*, 2004, **45**, 3341–3349.
- 20 A. Ranade, N. A. D’Souza, B. Gnade and A. Dharia, *J. Plast. Film Sheeting*, 2003, **19**, 271–285.

- 21 W. Shao, Q. Wang, F. Wang and Y. Chen, *J. Polym. Sci. Part B: Polym. Phys.*, 2006, **44**, 249–255.
- 22 K. Hedicke-Höchstötter, G. T. Lim and V. Altstädt, *Compos. Sci. Technol.*, 2009, **69**, 330–334.
- 23 K. Prashantha, M.-F. Lacrampe and P. Krawczak, *J. Appl. Polym. Sci.*, 2013, **130**, 313–321.
- 24 X. Xu, B. Li, H. Lu, Z. Zhang and H. Wang, *Appl. Surf. Sci.*, 2007, **254**, 1456–1462.
- 25 C. G. Cannon, *Spectrochim. Acta*, 1960, **16**, 302–319.
- 26 S. J. Cooper, M. Coogan, N. Everall and I. Priestnall, *Polymer*, 2001, **42**, 10119–10132.
- 27 Y. Ma, T. Zhou, G. Su, Y. Li and A. Zhang, *RSC Adv.*, 2016, **6**, 87405–87415.
- 28 I. Sandeman and H. W. Thompson, *Proc. R. Soc. A: Math. Phys. Eng. Sci.*, 1955, **232**, 105–113.
- 29 I. Matsubara and J. H. Magill, *Polymer*, 1966, **7**, 199–215.
- 30 D. Galimberti, C. Quarti, A. Milani, L. Brambilla, B. Civalieri and C. Castiglioni, *Vib. Spectrosc.*, 2013, **66**, 83–92.
- 31 C. G. Cannon and P. H. Harris, *J. Macromol. Sci. Part B: Phys.*, 1969, **3**, 357–364.
- 32 J. L. Koenig and M. C. Agboatwalla, *J. Macromol. Sci. Part B: Phys.*, 1968, **2**, 391–420.
- 33 N. Vasanthan, N. S. Murthy and R. G. Bray, *Macromolecules*, 1998, **31**, 8433–8435.
- 34 N. Vasanthan and D. R. Salem, *J. Polym. Sci., Part B: Polym. Phys.*, 2000, **38**, 516–524.
- 35 N. Vasanthan and D. R. Salem, *Mater. Res. Innovations*, 2001, **4**, 155–160.
- 36 D. Garcia and H. W. Starkweather Jr., *J. Polym. Sci., Polym. Phys. Ed.*, 1985, **23**, 537–555.
- 37 E. Chi, M. An, G. Yao, F. Tian and Z. Wang, *Crystals*, 2017, **7**, 384.
- 38 A. Attanasio, I. S. Bayer, R. Ruffilli, F. Ayadi and A. Athanassiou, *ACS Appl. Mater. Interfaces*, 2013, **5**, 5717–5726.
- 39 J. Gong, J. Li, J. Xu, Z. Xiang and L. Mo, *RSC Adv.*, 2017, **7**, 33486–33493.
- 40 N. Wang, E. Ding and R. Cheng, *Polymer*, 2007, **48**, 3486–3493.
- 41 A. G. B. Pereira, E. C. Muniz and Y.-L. Hsieh, *Carbohydr. Polym.*, 2014, **107**, 158–166.
- 42 D. Bikiaris, *Thermochim. Acta*, 2011, **523**, 25–45.

- 43 M. Nagalakshmaiah, N. El Kissi and A. Dufresne, *ACS Appl. Mater. Interfaces*, 2016, **8**, 8755–8764.
- 44 G.-m. Wu, D. Liu, G.-f. Liu, J. Chen, S.-p. Huo and Z.-w. Kong, *Carbohydr. Polym.*, 2015, **127**, 229–235.
